# Supplementary material
Source: HighWire-hosted journal article supplement (https://www.jpn.ca/highwire/filestream/90814/field_highwire_adjunct_files/0/JPN-220171-at-1.pdf)
Supplement: JPN-220171-at-1.pdf [file JPN-220171-at-1.pdf]

**Appendix 1** to Jin L, Yuan M, Chen J, et al. Abnormal cerebral metabolism and metabolic connectivity in individuals with heroin dependence: an integrated resting-state PET/fMRI study in large-scale networks. *J Psychiatry Neurosci* 2023. DOI: 10.1503/jpn.220199 To receive this resource in an accessible format, please contact us at [cmajgroup@cmaj.ca](mailto:cmajgroup@cmaj.ca).

Copyright © 2023 The Author(s) or their employer(s).

*Online appendices are unedited and posted as supplied by the authors*

## Supplemental table 1.

### The three key large-scale networks of the HD and HC groups

| Brain networks | ROIs        | Peak MNI |     |    | z value | volxes |
|----------------|-------------|----------|-----|----|---------|--------|
|                |             | x        | y   | z  |         |        |
| SN             | DACC        | 0        | 30  | 30 | 4.74    | 623    |
|                | Left AI     | -45      | 15  | -9 | 4.21    | 275    |
|                | Right AI    | 48       | 18  | -9 | 3.82    | 232    |
| DMN            | MPFC        | 0        | 57  | 9  | 8.75    | 3170   |
|                | PCC         | 0        | -51 | 18 | 6.37    | 632    |
|                | Left IPL    | -51      | -69 | 24 | 3.26    | 114    |
|                | Right IPL   | 51       | -63 | 30 | 3.27    | 80     |
| Left ECN       | Left DLPFC  | -45      | 45  | 3  | 5.74    | 1707   |
|                | Left PPC    | -36      | -72 | 48 | 9.82    | 1592   |
| Right ECN      | Right DLPFC | 36       | 60  | 0  | 5.2     | 1254   |
|                | Right PPC   | 45       | -60 | 51 | 11.07   | 1371   |

The 3 key large-scale networks derived from group independent component analyses: DMN = default mode network; SN = salience network; ECN = executive control network. Spatial maps for each brain network were converted to z-score images, then thresholded at  $z > 2.0$  and were showed in axial, coronal and sagittal views. The right side of the image corresponds to the right hemisphere of the brain. The key DMN regions consisted of the medial

**Appendix 1** to Jin L, Yuan M, Chen J, et al. Abnormal cerebral metabolism and metabolic connectivity in individuals with heroin dependence: an integrated resting-state PET/fMRI study in large-scale networks. *J Psychiatry Neurosci* 2023. DOI: 10.1503/jpn.220199 To receive this resource in an accessible format, please contact us at [cmajgroup@cmaj.ca](mailto:cmajgroup@cmaj.ca).

Copyright © 2023 The Author(s) or their employer(s).

*Online appendices are unedited and posted as supplied by the authors*

---

prefrontal cortex (MPFC), posterior cingulate cortex (PCC) and bilateral inferior parietal lobe (IPL). The key SN regions consisted of the dorsal anterior cingulate cortex (DACC) and bilateral anterior insula (AI). The bilateral ECN regions mainly consisted of the bilateral dorsolateral prefrontal cortices (DLPFC) and posterior parietal cortices (PPC).
